# Supplementary material for: Rationale for Incorporating Short-Term Endpoints in Interim Futility Analysis of Phase 3 Oncology Trials: A Simulation Study
Source: Research Square preprint supplement (doi:10.21203/rs.3.rs-7544231/v1), 2025-09-17
Supplement: Supplementary file 1 [file 3c67dab2eed50a721639fdeb.docx]

**Appendix**

**Table S1**. EAPDs (%) between Cases with and without Short-Term Endpoints Incorporated in Scenarios without Delayed Effects.

|  | % | 𝜑% | | | | |
| --- | --- | --- | --- | --- | --- | --- |
| 10 | 20 | 30 | 40 | 50 |
| 0.8 | 100 | 0.5 | 1.2 | 1.8 | 2.2 | 2.8 |
| 90 | 0.3 | 0.6 | 1.2 | 1.8 | 1.8 |
| 80 | 0.3 | 0.6 | 0.8 | 1.4 | 1.8 |
| 70 | 0.1 | 0.4 | 0.7 | 0.7 | 0.9 |
| 60 | 0.1 | 0.2 | 0.5 | 0.5 | 0.9 |
| 50 | 0.1 | 0.2 | 0.5 | 0.4 | 0.6 |
| 0 | -0.1 | -0.1 | -0.1 | -0.1 | -0.2 |
| 0.7 | 100 | 1.5 | 2.7 | 3.8 | 4.6 | 5.1 |
| 90 | 0.9 | 2.2 | 2.8 | 4.0 | 4.5 |
| 80 | 0.6 | 1.2 | 2.0 | 2.7 | 3.6 |
| 70 | 0.3 | 0.9 | 1.4 | 1.7 | 2.1 |
| 60 | 0.2 | 0.4 | 1.1 | 1.3 | 1.5 |
| 50 | 0.0 | 0.3 | 0.5 | 0.8 | 0.7 |
| 0 | -0.1 | 0.0 | -0.1 | -0.2 | -0.1 |
| 0.6 | 100 | 2.4 | 4.7 | 7.2 | 9.5 | 11.4 |
| 90 | 1.8 | 3.5 | 5.2 | 6.6 | 8.2 |
| 80 | 1.0 | 2.3 | 3.6 | 4.8 | 6.0 |
| 70 | 0.6 | 1.1 | 2.1 | 3.2 | 4.0 |
| 60 | 0.2 | 0.8 | 1.5 | 2.2 | 2.9 |
| 50 | 0.2 | 0.3 | 0.6 | 1.1 | 1.5 |
| 0 | -0.3 | -0.2 | -0.2 | 0.1 | -0.2 |

**Table S2**. Time and Sample Size Savings after Introducing Futility Analysis in Scenarios without Delayed Effects.

|  | % | Considering short-term endpoint | Most Time-Saving Design | | | Most Sample Size-Saving Design | | |
| --- | --- | --- | --- | --- | --- | --- | --- | --- |
| %, % | % | % | %, % | % | % |
| 0.8 | 100 | Y | 30, 20 | 36.4 | 17.7 | 25, 15 | 18.7 | 33.0 |
| N | 40, 20 | 34.8 | 10.6 | 10, 10 | 16.6 | 21.0 |
| 80 | Y | 40, 20 | 34.8 | 10.6 | 25, 15 | 18.7 | 33.0 |
| N | 45, 20 | 34.1 | 6.8 | 25, 15 | 18.6 | 32.8 |
| 60 | Y | 35, 20 | 35.8 | 14.3 | 20, 15 | 20.2 | 31.4 |
| N | 40, 20 | 34.8 | 10.6 | 20, 15 | 20.3 | 31.5 |
| 0 | Y | 35, 20 | 35.8 | 14.3 | 20, 15 | 20.2 | 31.4 |
| N | 35, 20 | 36.0 | 14.4 | 20, 15 | 20.3 | 31.5 |
| 0.7 | 100 | Y | 40, 25 | 36.9 | 11.1 | 20, 15 | 21.0 | 32.7 |
| N | 40, 15 | 32.6 | 9.9 | 15, 10 | 17.0 | 23.7 |
| 80 | Y | 35, 20 | 35.3 | 14.0 | 20, 15 | 21.0 | 32.7 |
| N | 45, 20 | 34.0 | 6.7 | 25, 15 | 18.5 | 32.6 |
| 60 | Y | 30, 20 | 36.5 | 17.6 | 20, 15 | 21.0 | 32.7 |
| N | 45, 20 | 34.0 | 6.7 | 25, 15 | 18.5 | 32.6 |
| 0 | Y | 30, 20 | 36.5 | 17.6 | 15, 15 | 21.4 | 29.9 |
| N | 35, 20 | 35.4 | 14.0 | 15, 15 | 21.5 | 30.1 |
| 0.6 | 100 | Y | 35, 25 | 38.8 | 15.8 | 20, 20 | 23.0 | 35.8 |
| N | 50, 15 | 30.8 | 3.2 | 15, 10 | 16.9 | 23.6 |
| 80 | Y | 35, 20 | 36.1 | 14.7 | 20, 15 | 20.4 | 31.8 |
| N | 45, 20 | 33.7 | 6.9 | 15, 10 | 16.9 | 23.6 |
| 60 | Y | 30, 20 | 36.6 | 18.1 | 20, 15 | 20.4 | 31.8 |
| N | 40, 20 | 35.5 | 10.9 | 20, 15 | 20.3 | 31.6 |
| 0 | Y | 40, 25 | 37.3 | 11.5 | 25, 15 | 18.9 | 32.8 |
| N | 35, 20 | 36.0 | 14.6 | 20, 15 | 20.3 | 31.6 |

**Table S3**. EAPDs (%) between Cases with and without Short-Term Endpoints Incorporated in Scenarios with Delayed Effects.

| Scenario | months | Considering delayed effect in analysis | % | | | | |
| --- | --- | --- | --- | --- | --- | --- | --- |
| 10 | 20 | 30 | 40 | 50 |
| 4 | 3 | Y | -0.4 | -0.4 | -0.4 | -0.2 | 0.1 |
| N | -0.1 | -0.2 | 0.2 | 0.0 | 0.2 |
| 5 | 3 | Y | 2.0 | 4.3 | 6.1 | 8.2 | 10.4 |
| N | 0.8 | 1.1 | 1.3 | 1.5 | 1.8 |
| 6 | 3 | Y | 0.9 | 1.7 | 2.5 | 4.0 | 5.0 |
| N | 0.0 | 0.1 | 0.3 | 0.6 | 0.5 |

**Table S4**. Time and Sample Size Savings after Introducing Futility Analysis in Scenarios with Delayed Effects.

| Scenario | months | Considering delayed effect | Considering short-term endpoint | Most Time-Saving Design | | | Most Sample Size-Saving Design | | |
| --- | --- | --- | --- | --- | --- | --- | --- | --- | --- |
| %, % | % | % | %, % | % | % |
| 4 | 3 | Y | Y | 45, 20 | 32.0 | 6.5 | 25, 10 | 12.7 | 22.1 |
| Y | N | 55, 30 | 32.1 | 1.1 | 25, 10 | 12.2 | 21.1 |
| N | Y | 65, 10 | 25.3 | 0.0 | 60, 5 | 0.2 | 24.3 |
| N | N | 65, 10 | 25.2 | 0.0 | 50, 5 | 2.6 | 24.7 |
| 5 | 3 | Y | Y | 40, 25 | 35.4 | 10.9 | 20, 15 | 17.2 | 26.7 |
| Y | N | 55, 15 | 28.3 | 0.9 | 30, 10 | 11.5 | 23.2 |
| N | Y | 65, 5 | 23.2 | 0.0 | 65, 5 | 0.0 | 23.2 |
| N | N | 65, 5 | 23.2 | 0.0 | 65, 5 | 0.0 | 23.2 |
| 6 | 3 | Y | Y | 45, 25 | 34.0 | 6.9 | 25, 15 | 15.8 | 27.3 |
| Y | N | 50, 20 | 30.9 | 3.1 | 25, 10 | 12.2 | 21.1 |
| N | Y | 65, 5 | 23.2 | 0.0 | 65, 5 | 0.0 | 23.2 |
| N | N | 65, 5 | 23.2 | 0.0 | 65, 5 | 0.0 | 23.2 |

**Table S5**. Simulation Scenarios with Reversed Direct and Indirect Effects.

| Scenario |  | % |  |  |
| --- | --- | --- | --- | --- |
| 1 | 0.6 | 40 | 0.18 | 1.1 |
| 2 | 0.7 | 40 | 0.24 | 1.2 |
| 3 | 0.8 | 40 | 0.35 | 1.2 |

Based on the total treatment effect, direct effect , and the response rate difference between the treatment groups, the indirect effect hazard ratio is derived through 2000 simulations to achieve a trial power of 85% in the absence of futility analysis.

**Table S6**. Simulation Scenarios with Different Enrollment Durations.

|  | % | % |  |  | Enrollment duration in months |
| --- | --- | --- | --- | --- | --- |
| 0.6 | 100 | 30 | 0.11 | 1.00 | 6, 12, 18 |
|  | 80 | 30 | 0.18 | 0.90 |
|  | 60 | 30 | 0.30 | 0.82 |

Based on the total treatment effect and the proportion of indirect effects , the direct effect can be calculated. Given , , and the response rate difference between the treatment groups, the indirect effect hazard ratio is derived through 2000 simulations to achieve a trial power of 85% in the absence of futility analysis.

**Table S7**. Different Effect Delay Times Specified in Analysis.

| Scenario |  |  |  |  |  | months | months |
| --- | --- | --- | --- | --- | --- | --- | --- |
| 1 | 0.4 | 1 | 1 | 1 | 0.46 | 3 | 0, 1, 2, 3, 4, 5 |
|
| 2 | 0.4 | 1 | 0.07 | 1 | 1 | 3 | 0, 1, 2, 3, 4, 5 |
|
| 3 | 0.4 | 1 | 0.19 | 1 | 0.8 | 3 | 0, 1, 2, 3, 4, 5 |
|

Given the total treatment effect , , the response rate difference between the treatment groups, and the partially specified values of the parameters , , , and , the values of the remaining parameters are derived through 2000 simulations to achieve a trial power of 85% in the absence of futility analysis.


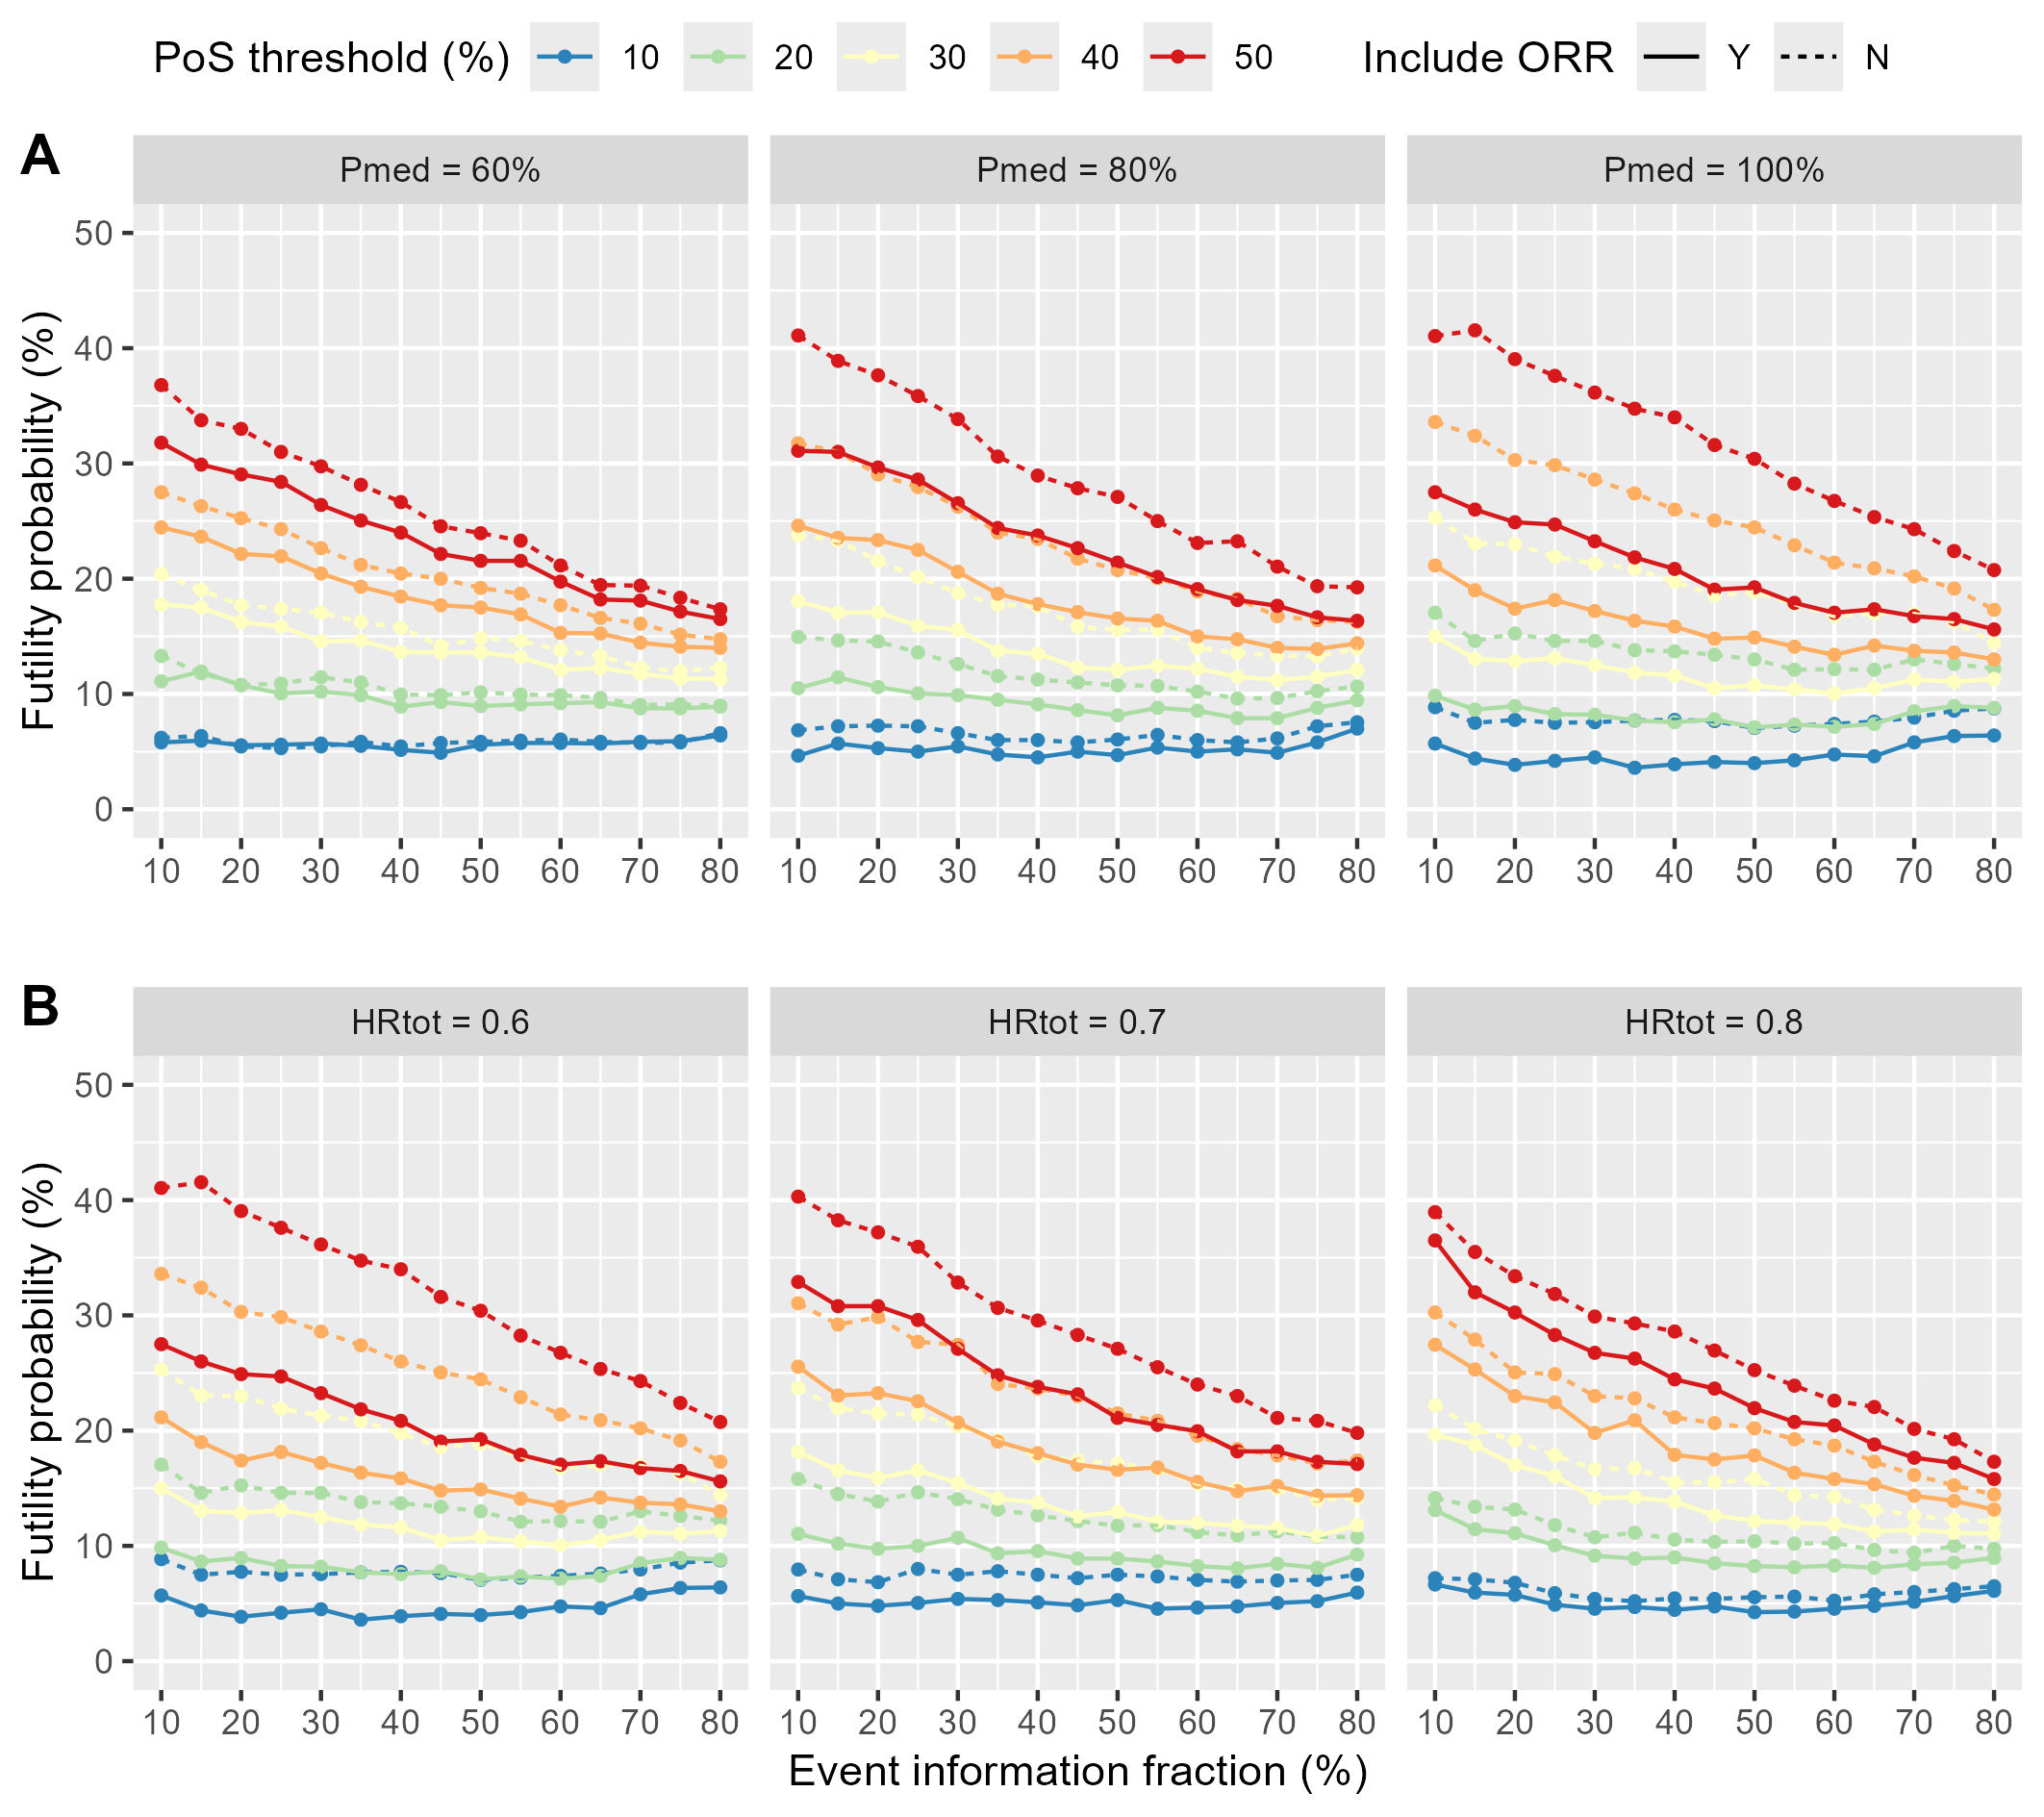


**Figure S1**. Probability of Futility Stopping under Hypothesis in Scenarios without Delayed Effects.

In Subfigure A, the total treatment effect 0.6, with indirect effect proportions of 60%, 80%, and 100%, respectively; in Subfigure B, 100%, and values are 0.6, 0.7, and 0.8, respectively.


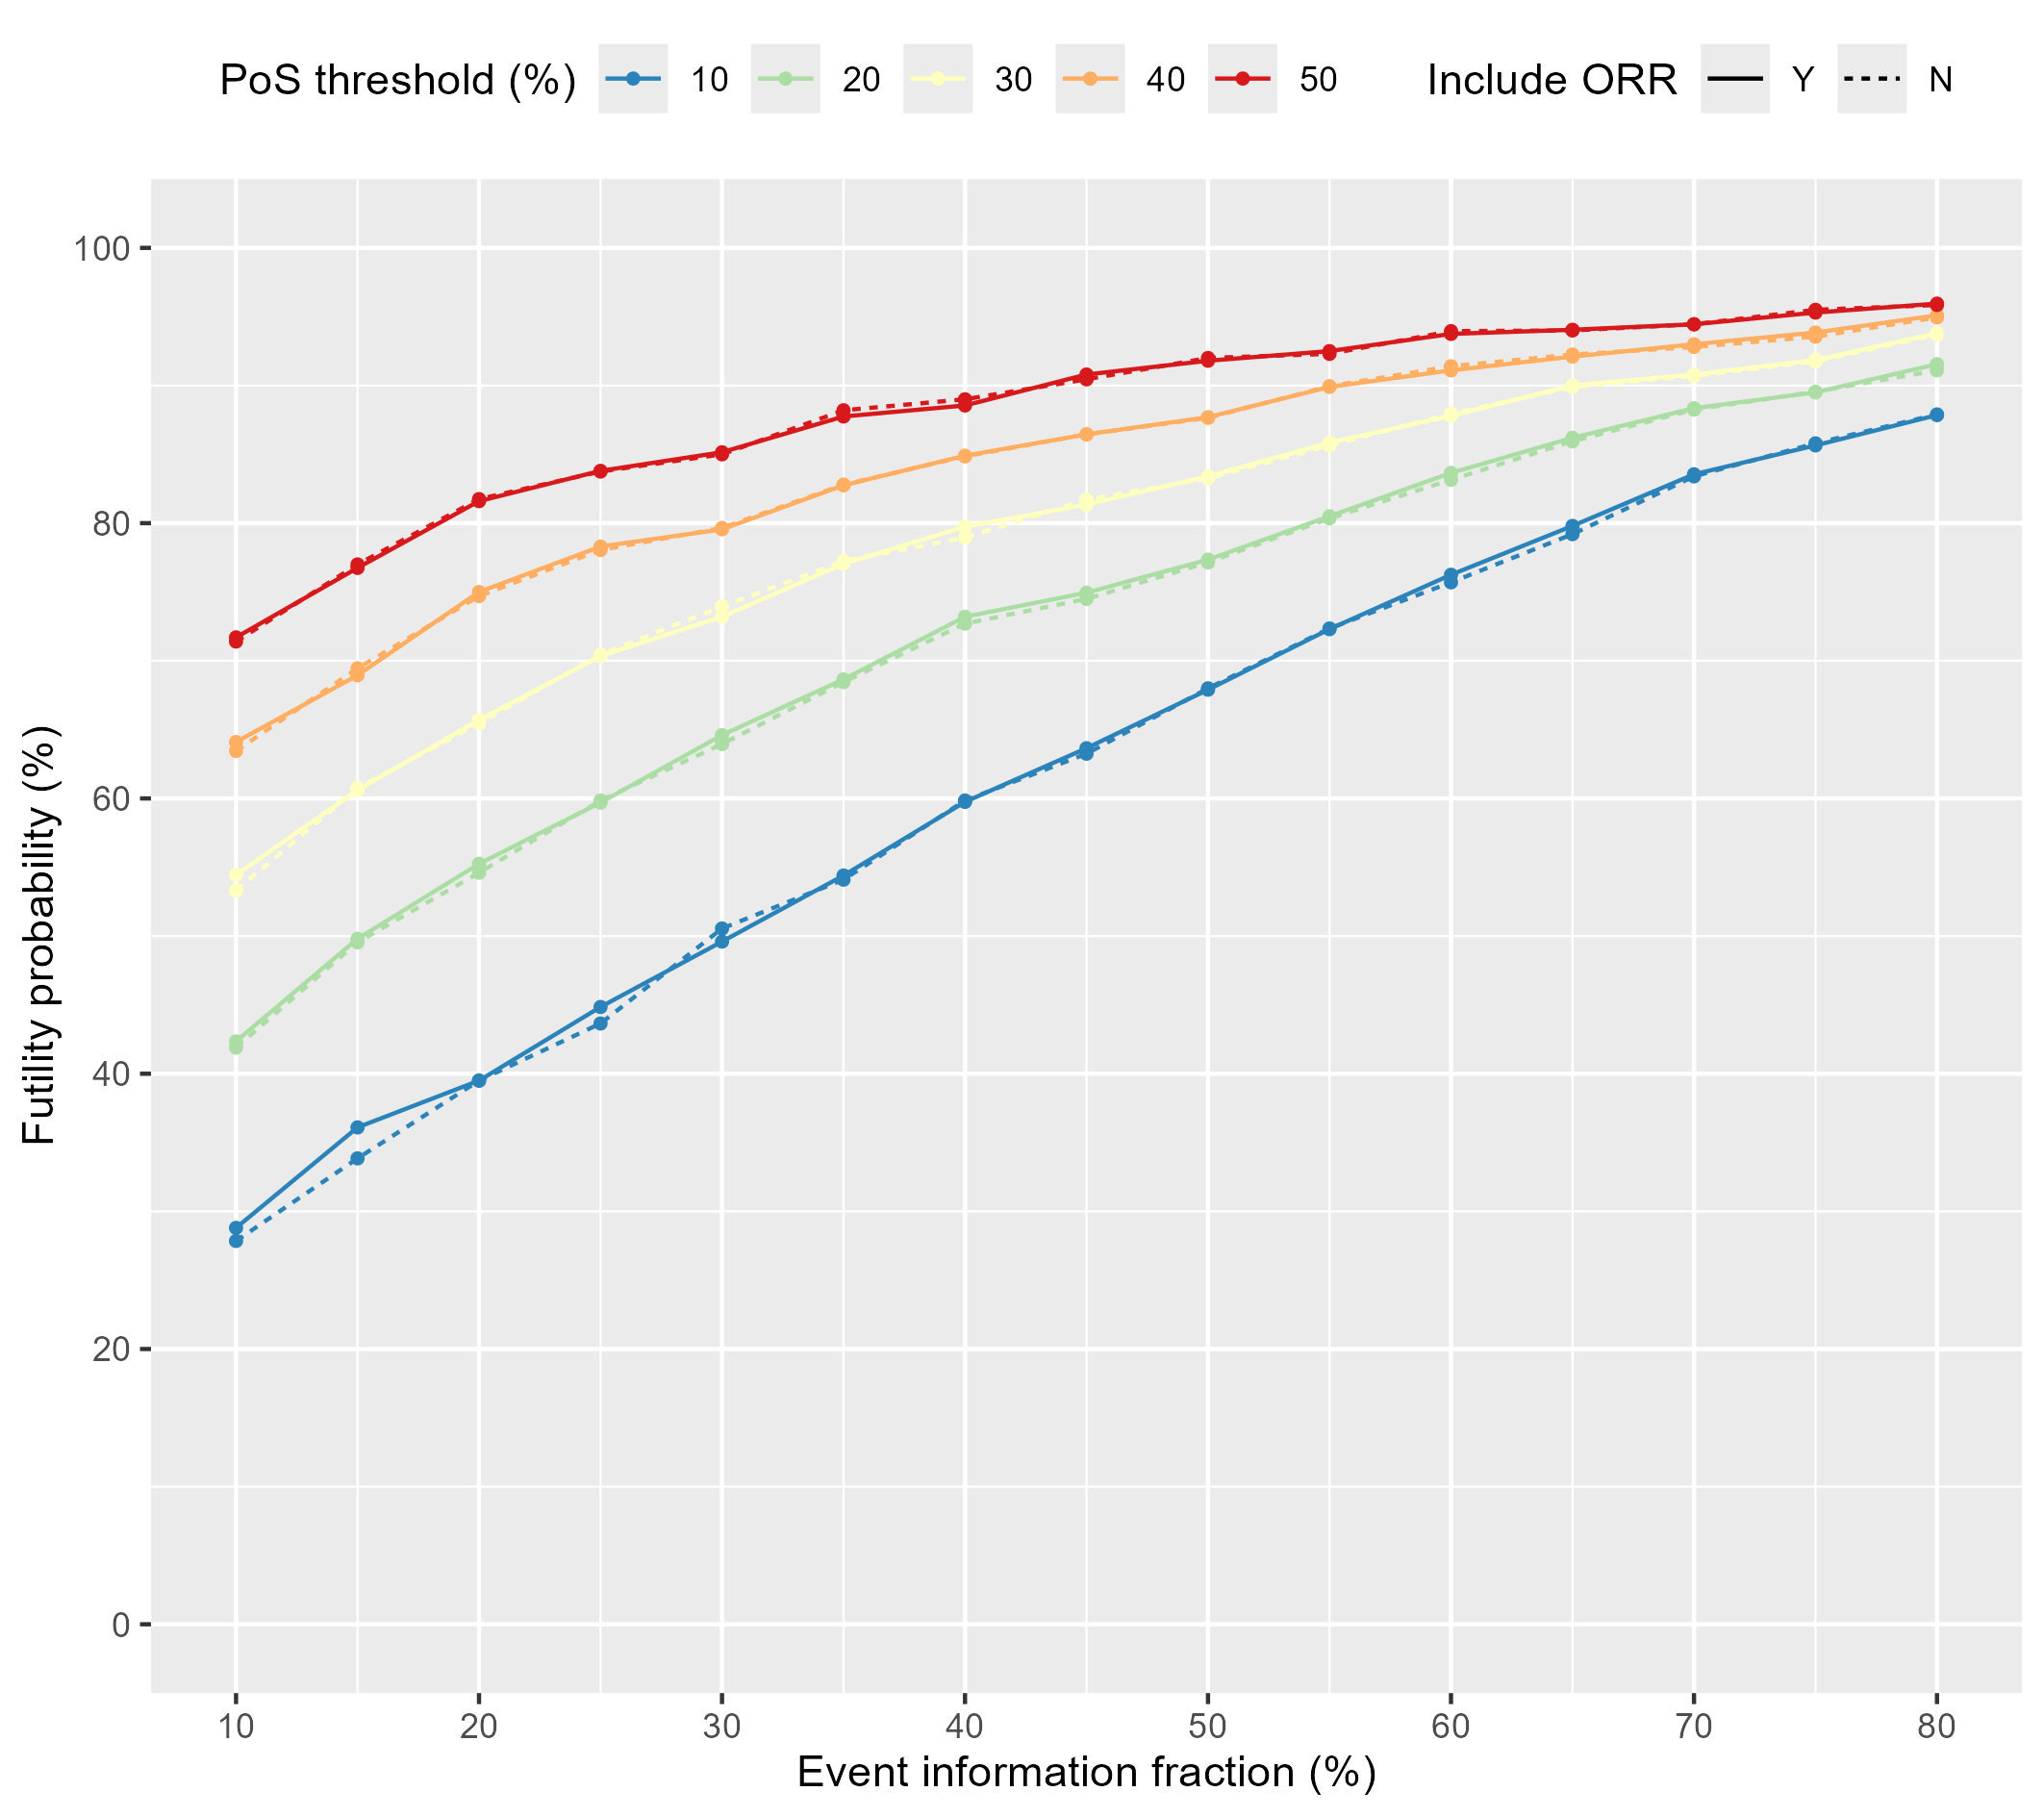


**Figure S2.** Probability of Futility Stopping under Hypothesis in Scenarios without Delayed Effects.


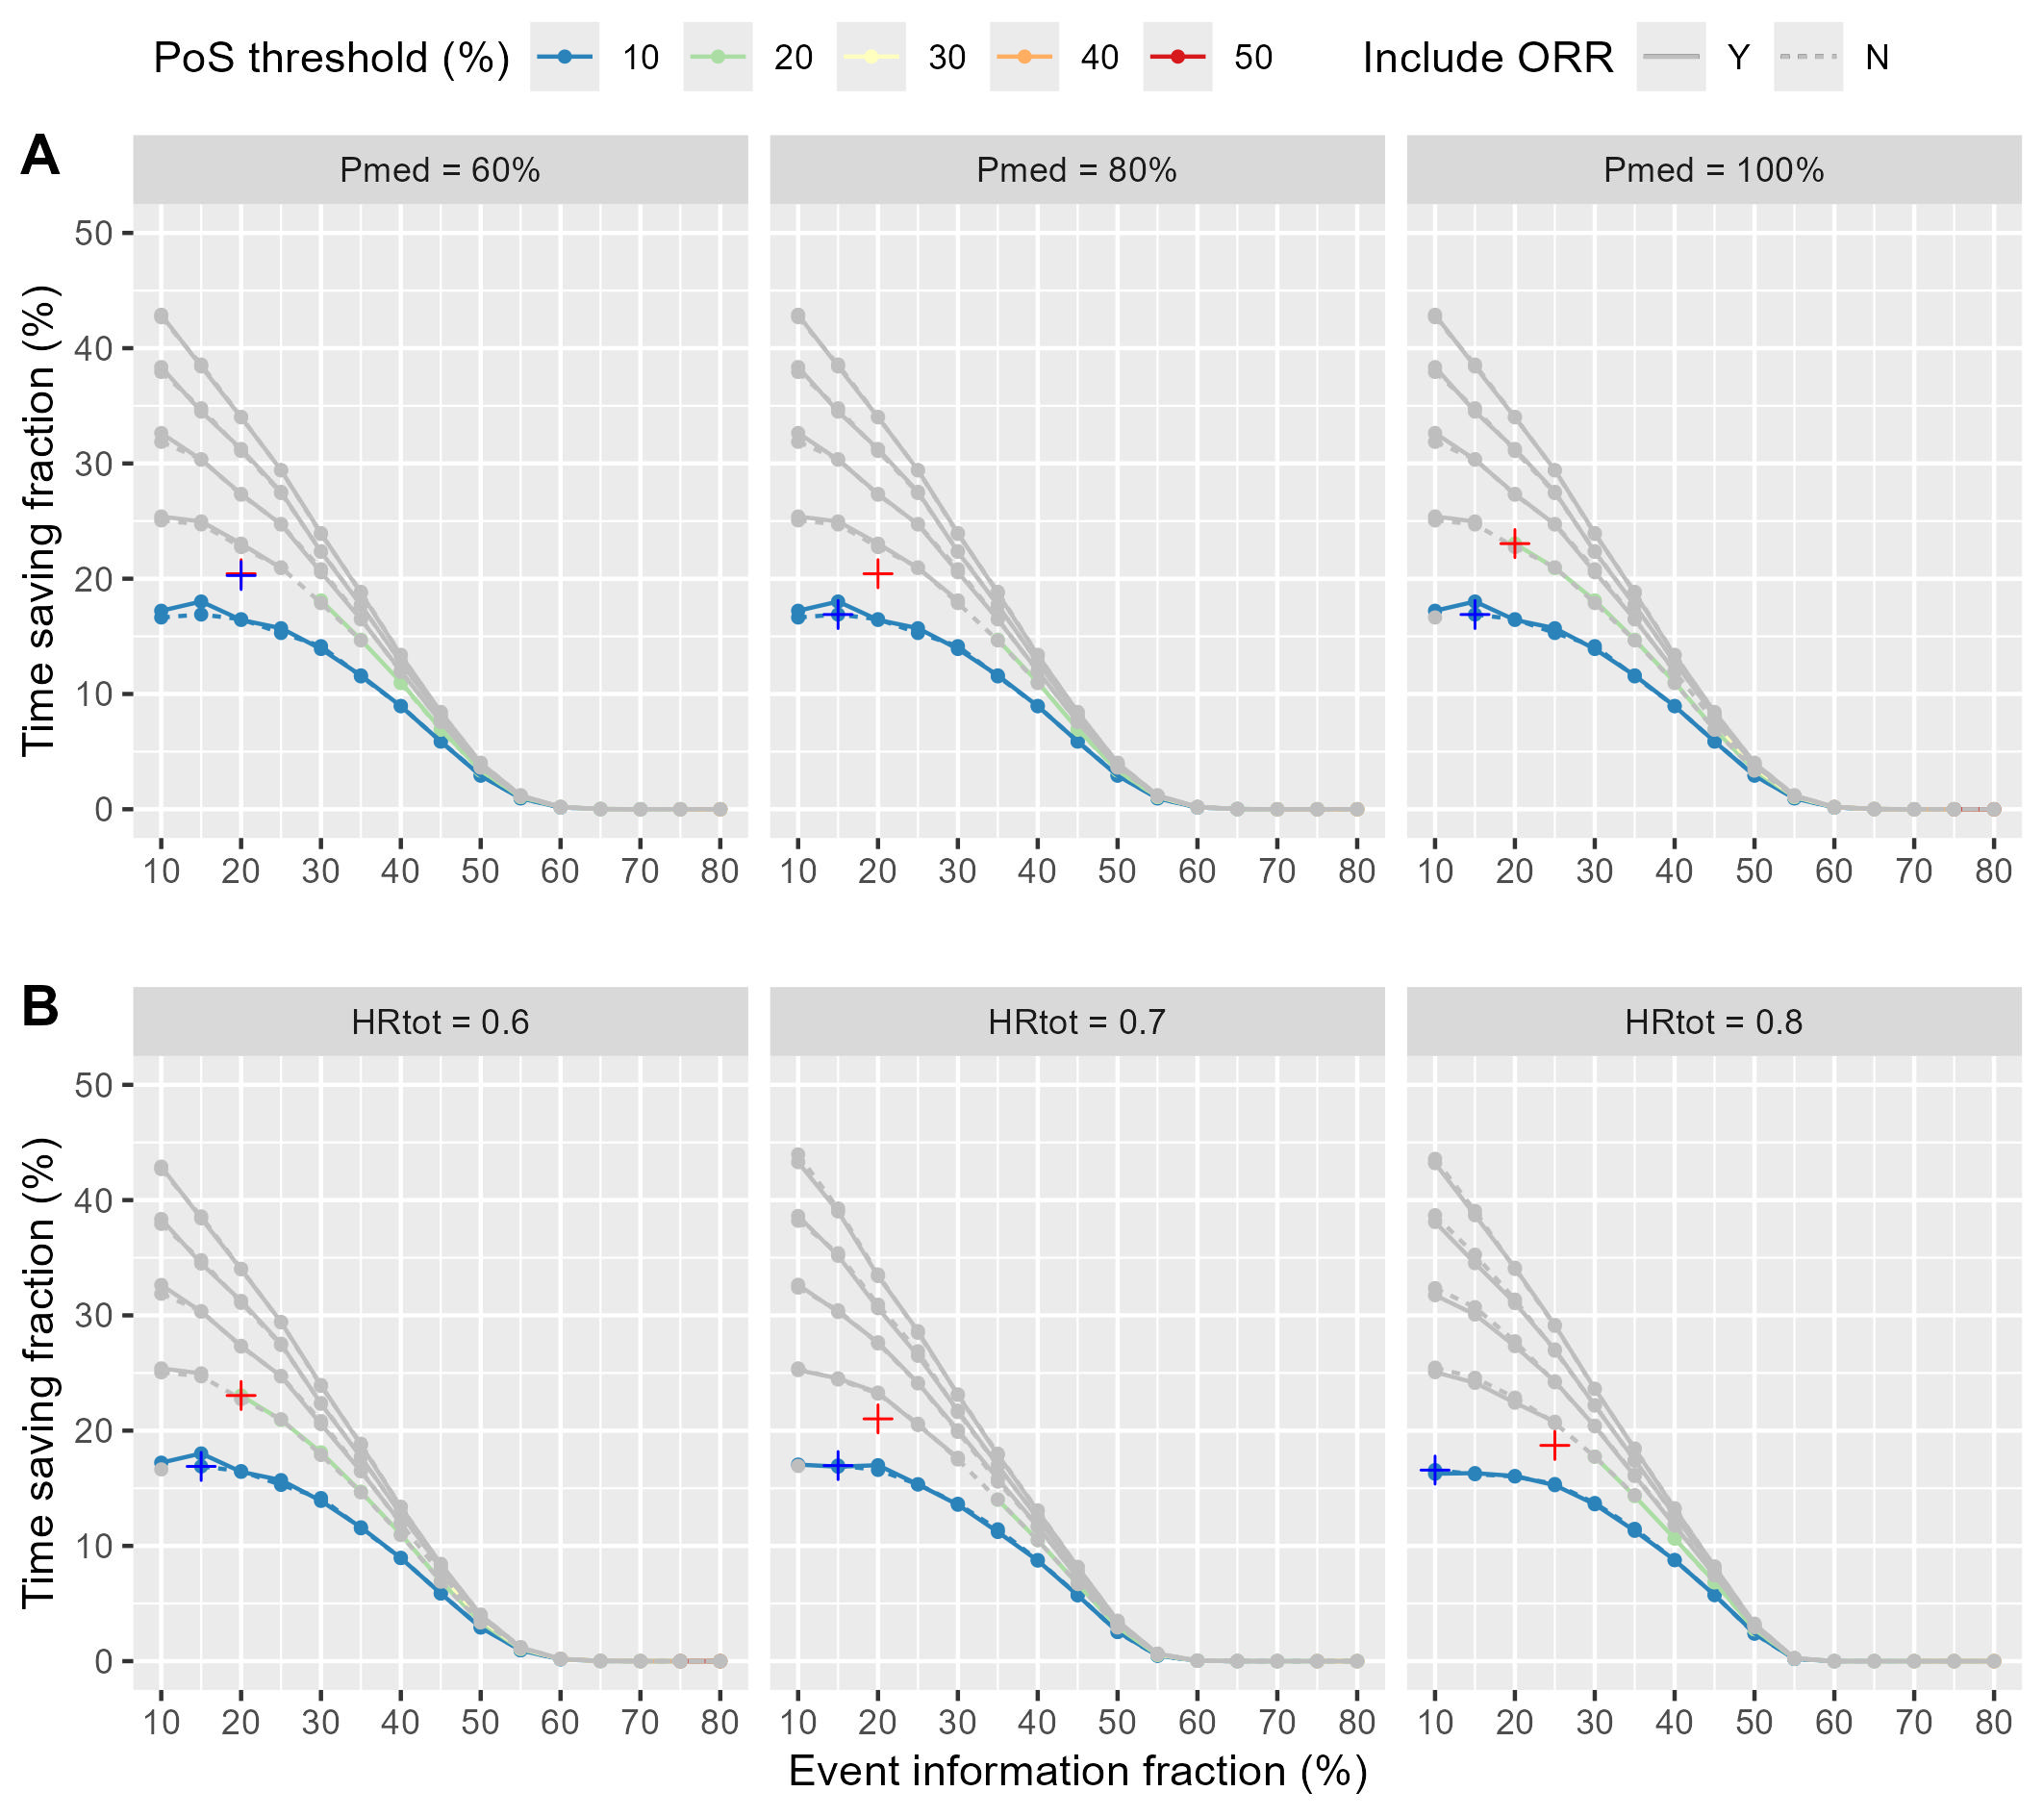


**Figure S3**. Sample Size Savings after Introducing Futility Analysis in Scenarios without Delayed Effects.

In Subfigure A, the total treatment effect is 0.6, with indirect effect proportions of 60%, 80%, and 100%, respectively; in Subfigure B, 100%, and values are 0.6, 0.7, and 0.8, respectively. The gray lines and dots indicate a reduction in power ＞5% due to the introduction of futility analysis under the hypothesis, while the colored lines and dots indicate a reduction in power ≤5%. **+** and **+** represent the maximum sample size saved by incorporating and not incorporating short-term endpoints after introducing futility analysis, respectively. Note that the thresholds used in the simulation are 10%, 15%, 20%, ..., and 50%; however, only the thresholds of 10%, 20%, 30%, ..., and 50% are displayed in the figure.


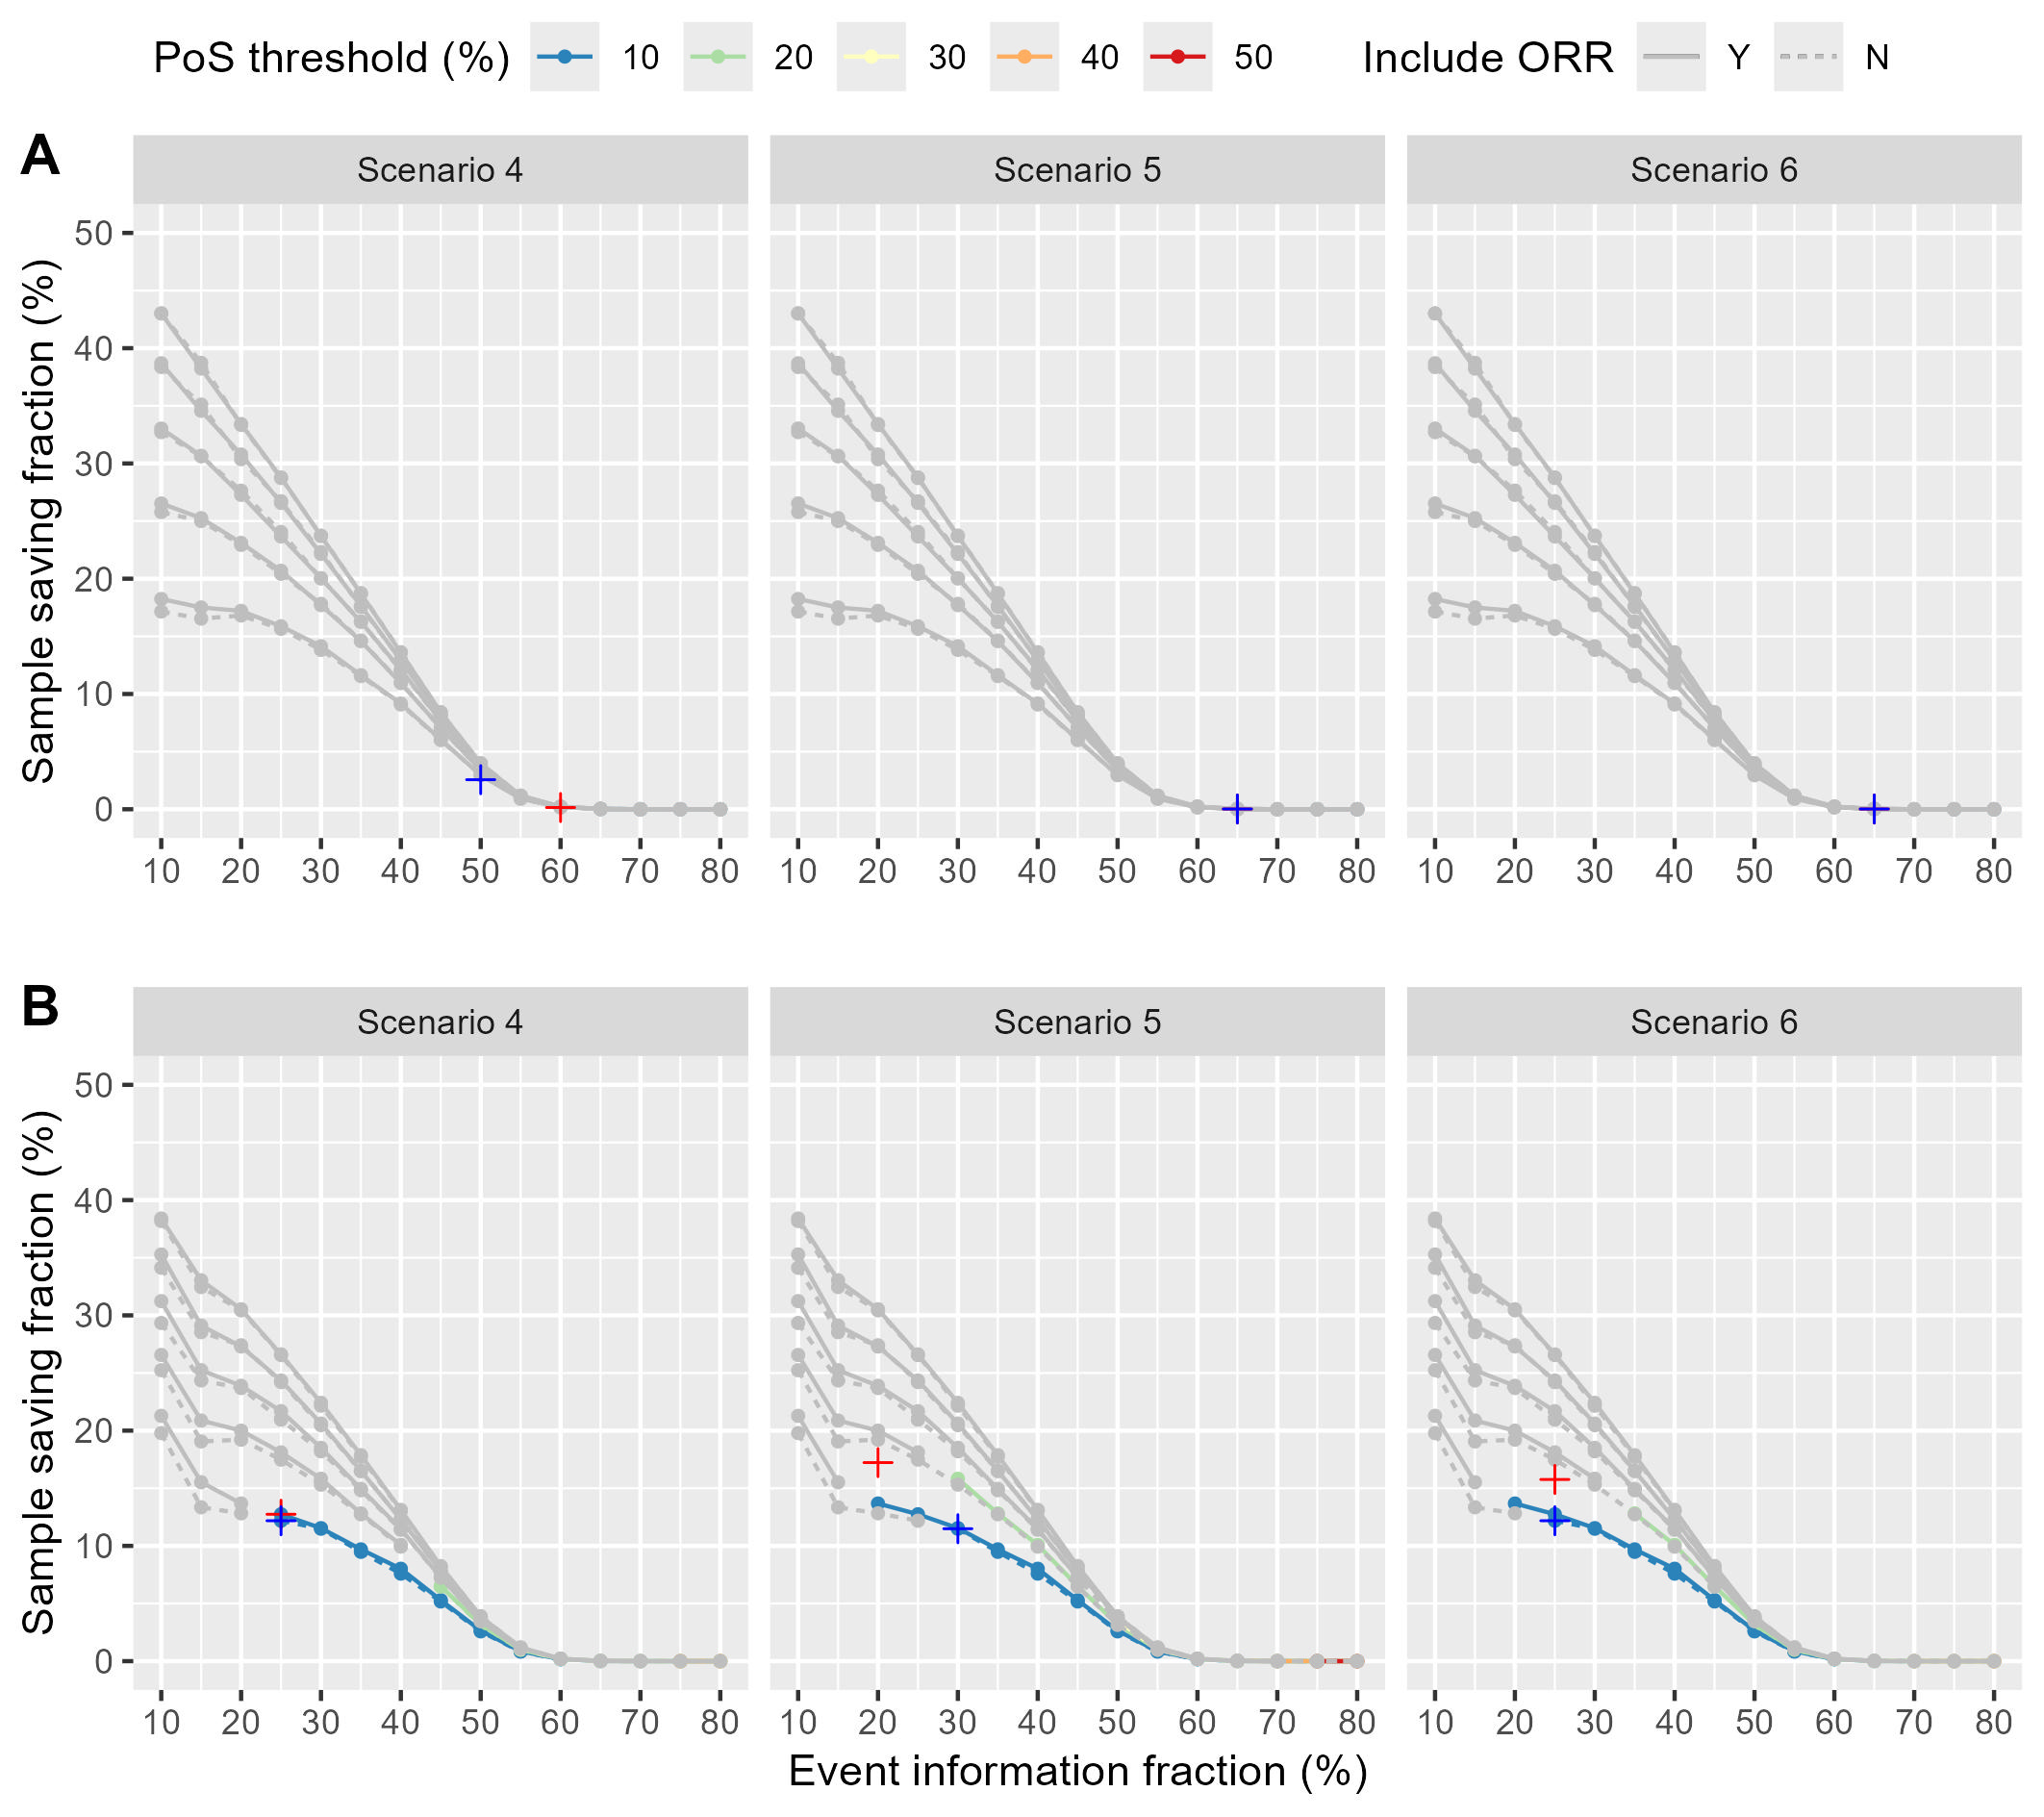


**Figure S4**. Sample Size Savings after Introducing Futility Analysis in Scenarios with Delayed Effects.

In Subfigure A, the delayed effects are not considered in the analysis; while in Subfigure B, they are considered. The gray lines and dots indicate a reduction in power ＞5% due to the introduction of futility analysis under the hypothesis, while the colored lines and dots indicate a reduction in power ≤5%. **+** and **+** represent the maximum sample size saved by incorporating and not incorporating short-term endpoints after introducing futility analysis, respectively. Note that the futility thresholds of used in the simulation are 10%, 15%, 20%, ..., and 50%; however, only the thresholds of 10%, 20%, 30%, ..., and 50% are displayed in the figure.


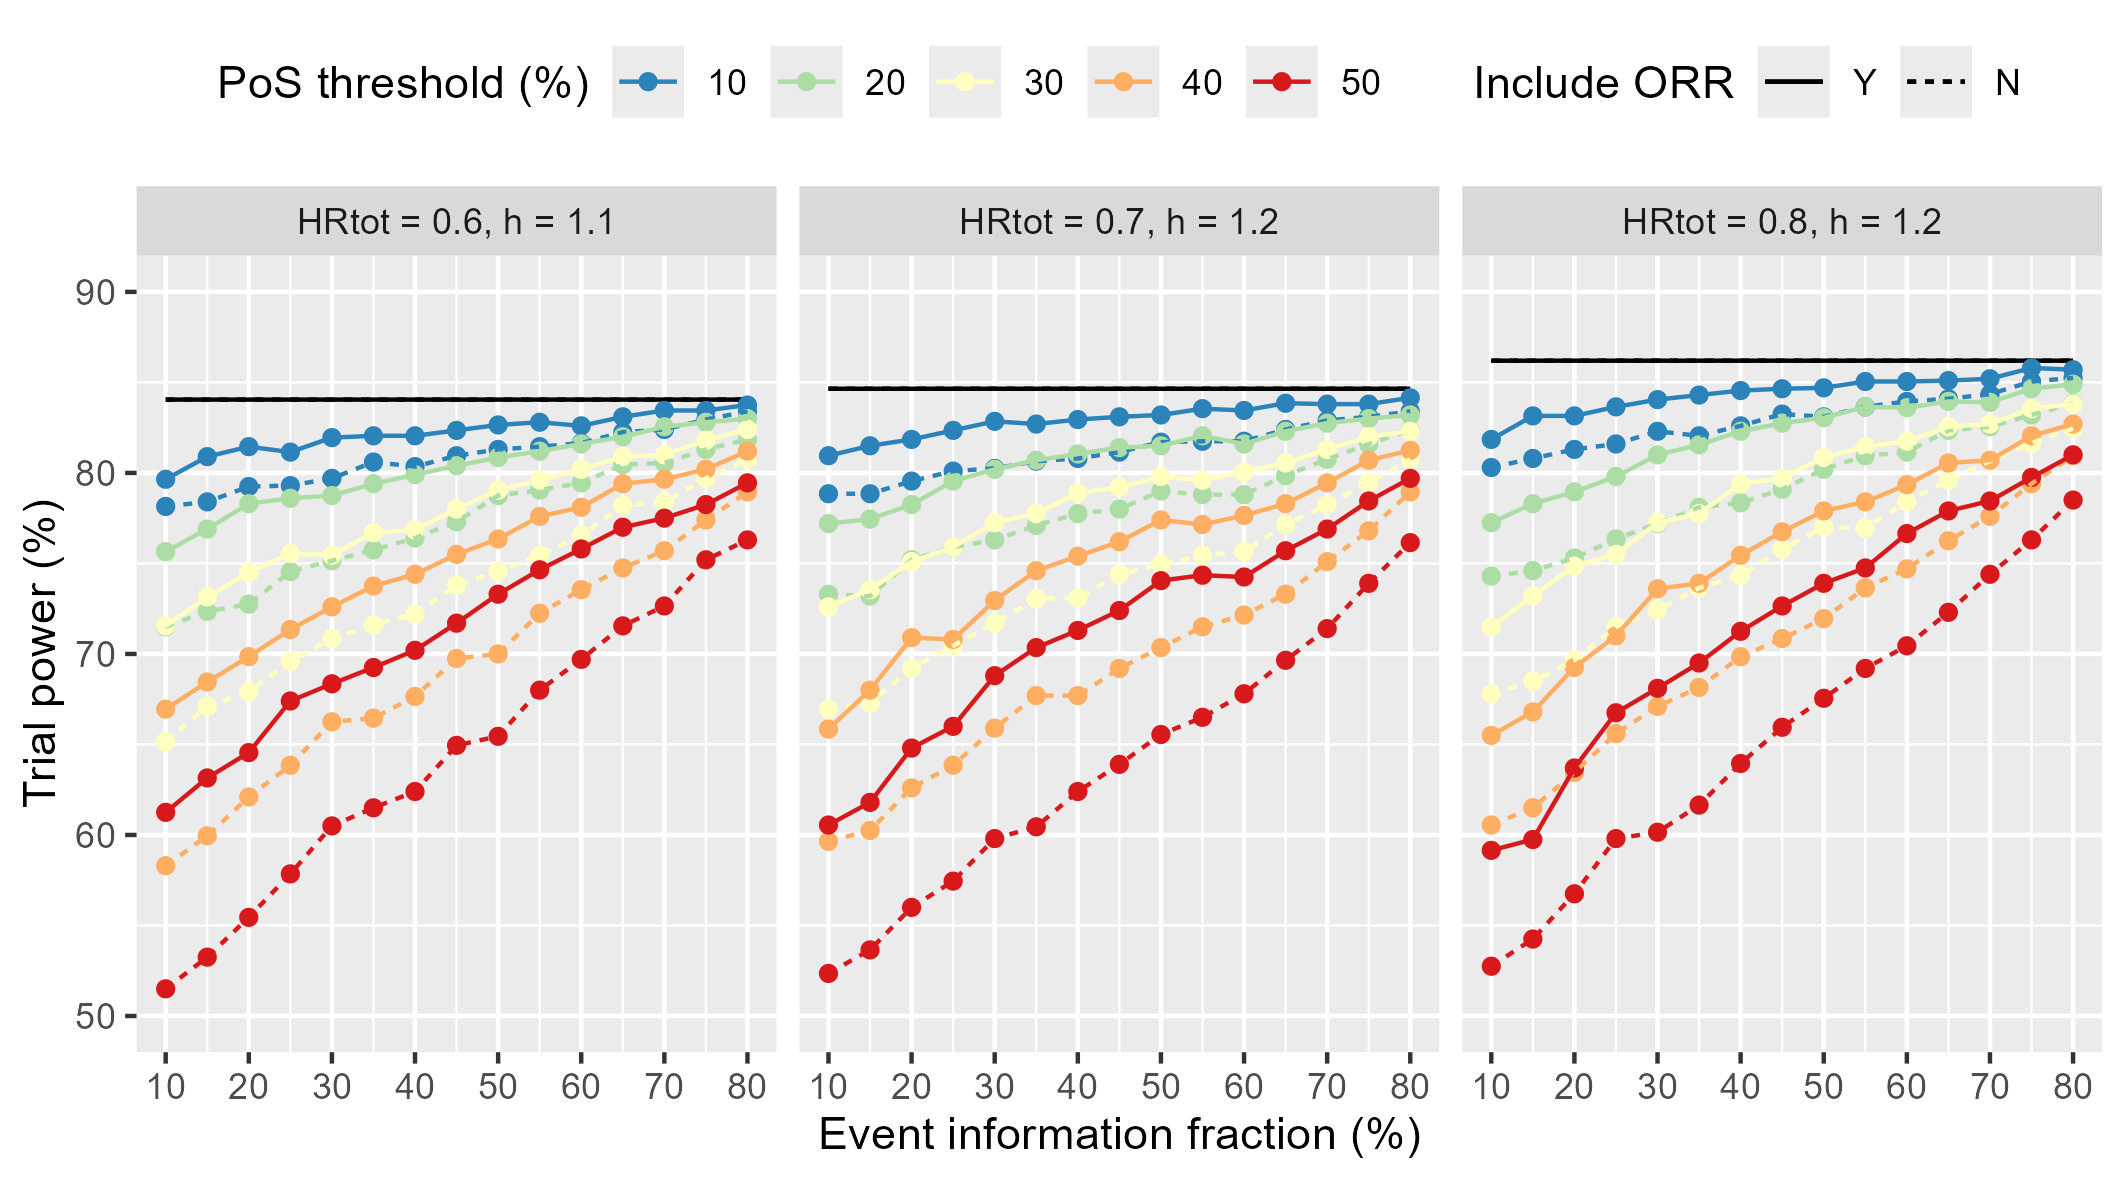


**Figure S5**. Trial Power with Reversed Direct and Indirect Effects.

The horizontal black line represents the trial power in the absence of futility analysis.


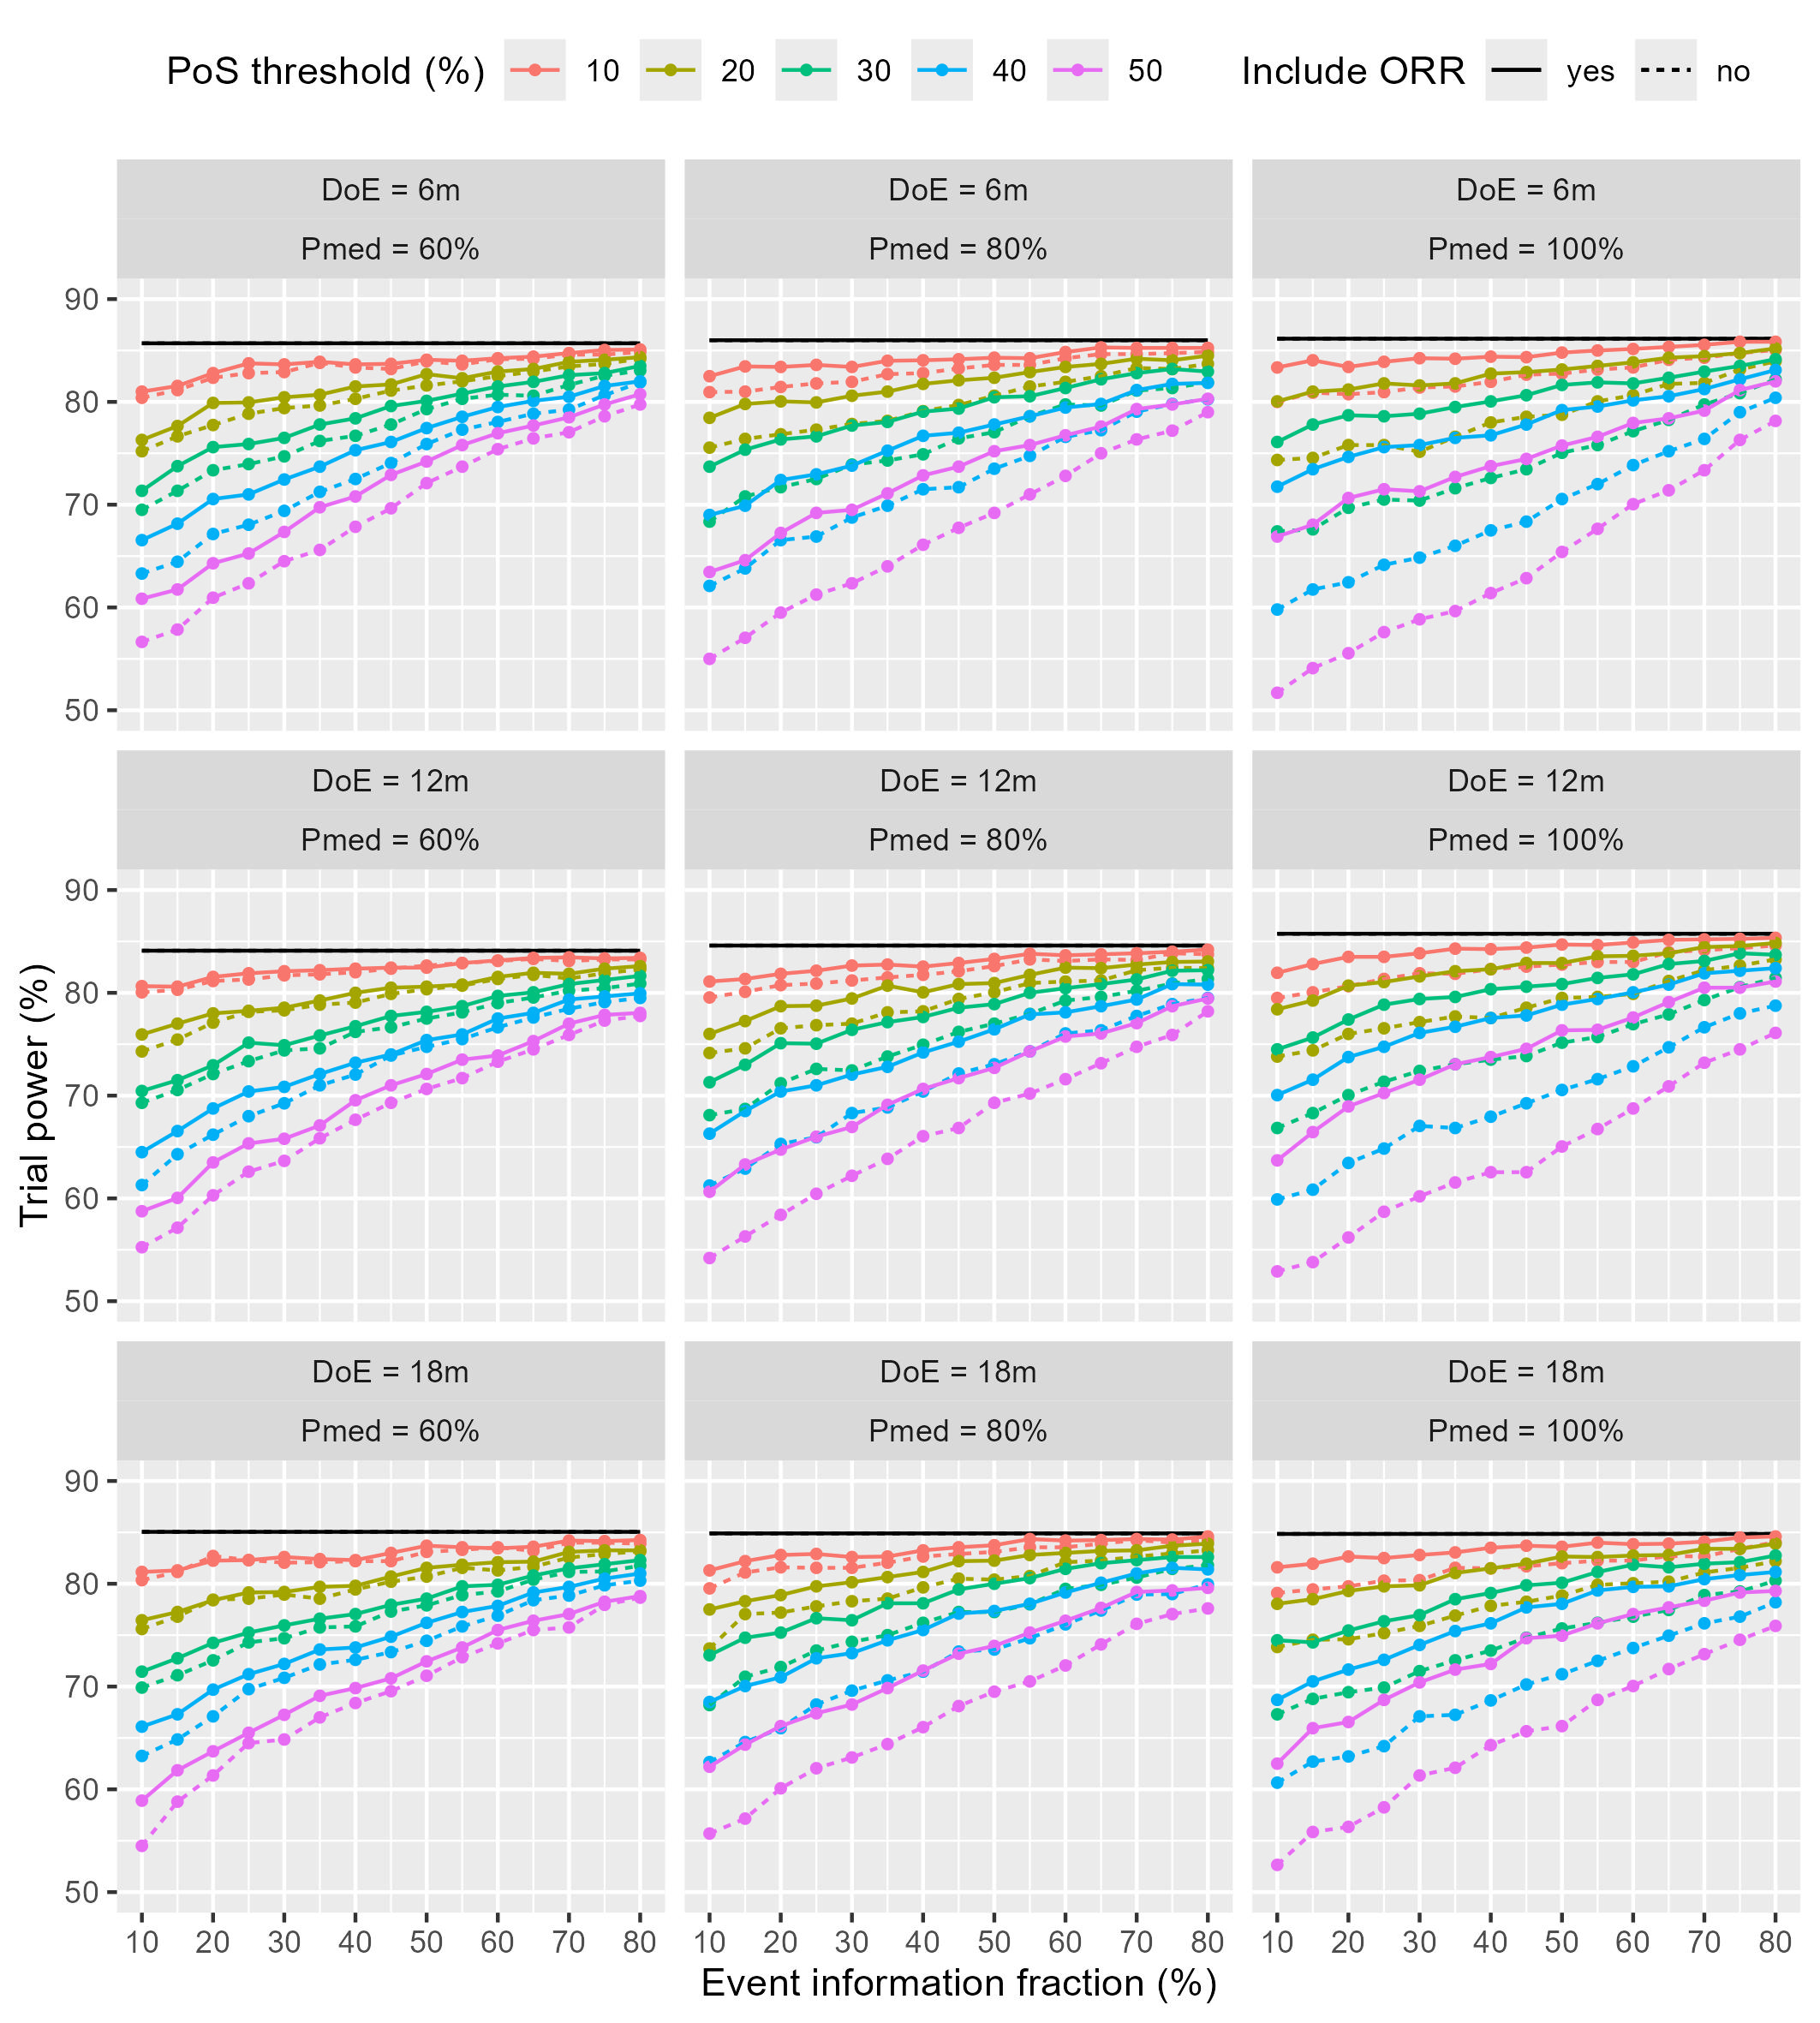


**Figure S6**. Trial Power with Different Enrollment Durations.

DoE means duration of enrollment in months. The horizontal black line represents the trial power in the absence of futility analysis.


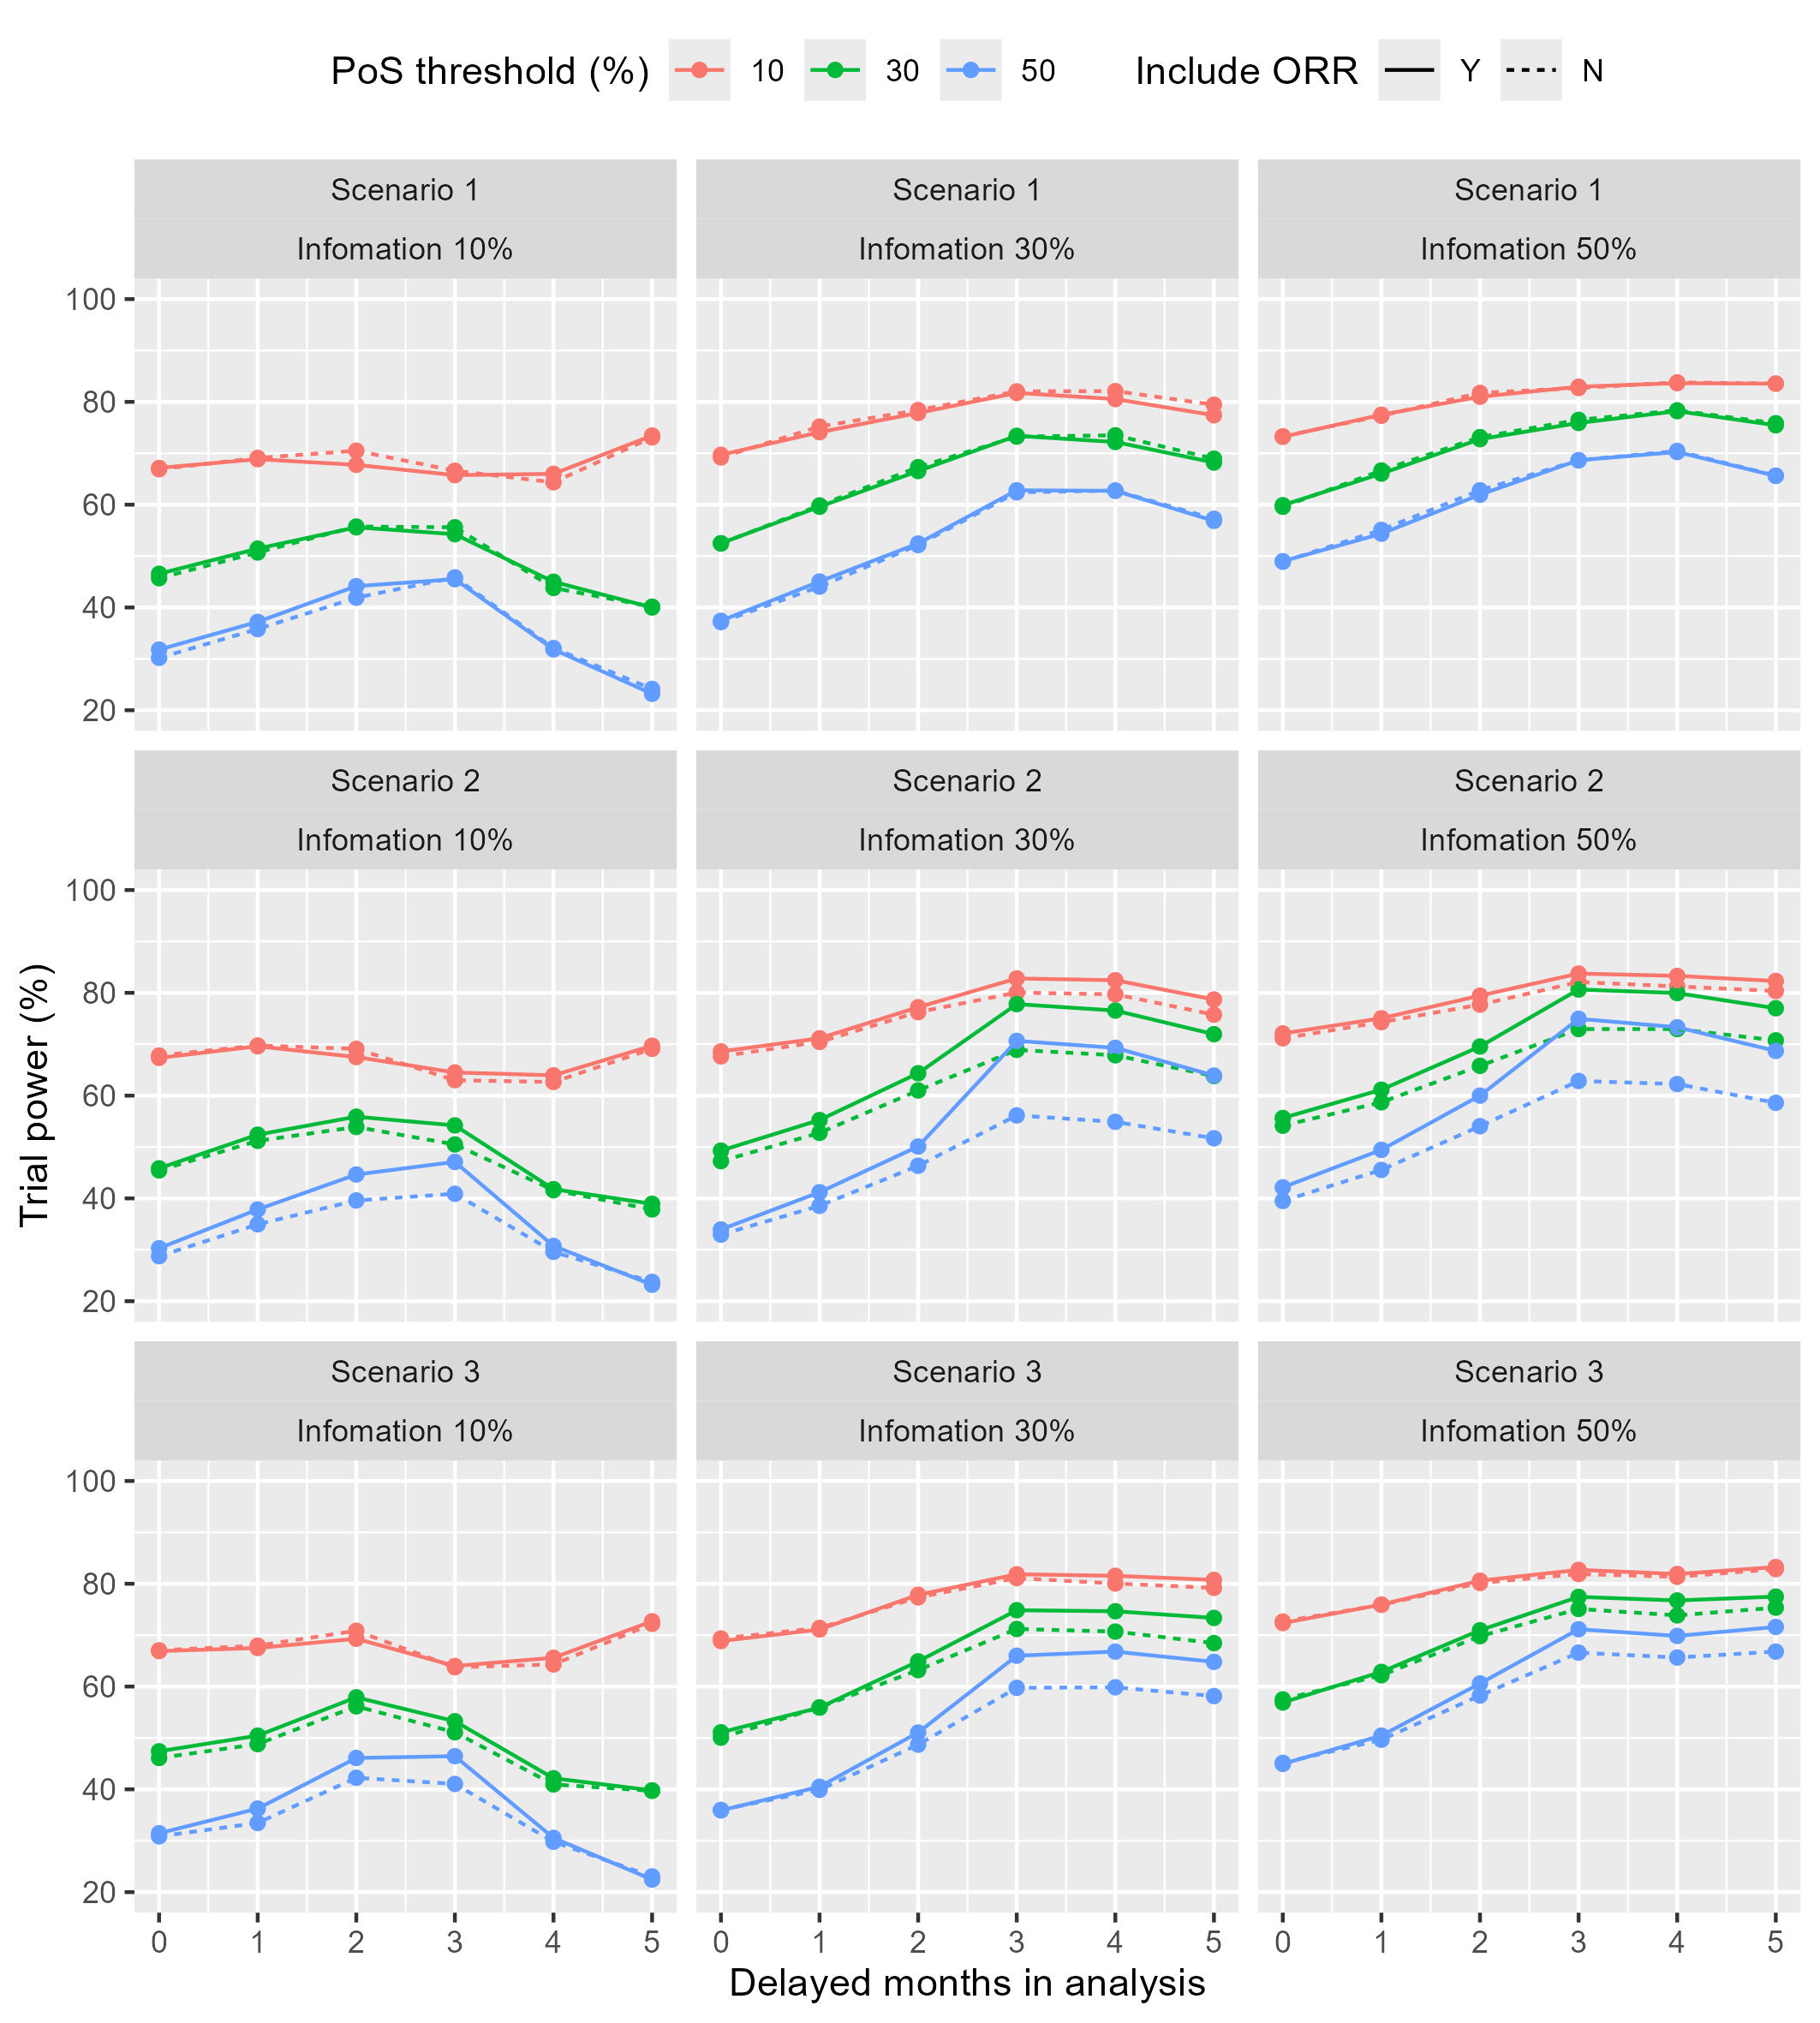


**Figure S7**. Trial Power with Different Effect Delay Times Specified in Analysis.

For Scenarios 1, 2, and 3, the actual effect delay times are all 3 months; the effect delay times specified in the analysis are 0, 1, 2, 3, 4, and 5 months, respectively. The figure shows the trial power when futility analysis is performed at 10%, 30%, and 50% event information, respectively.


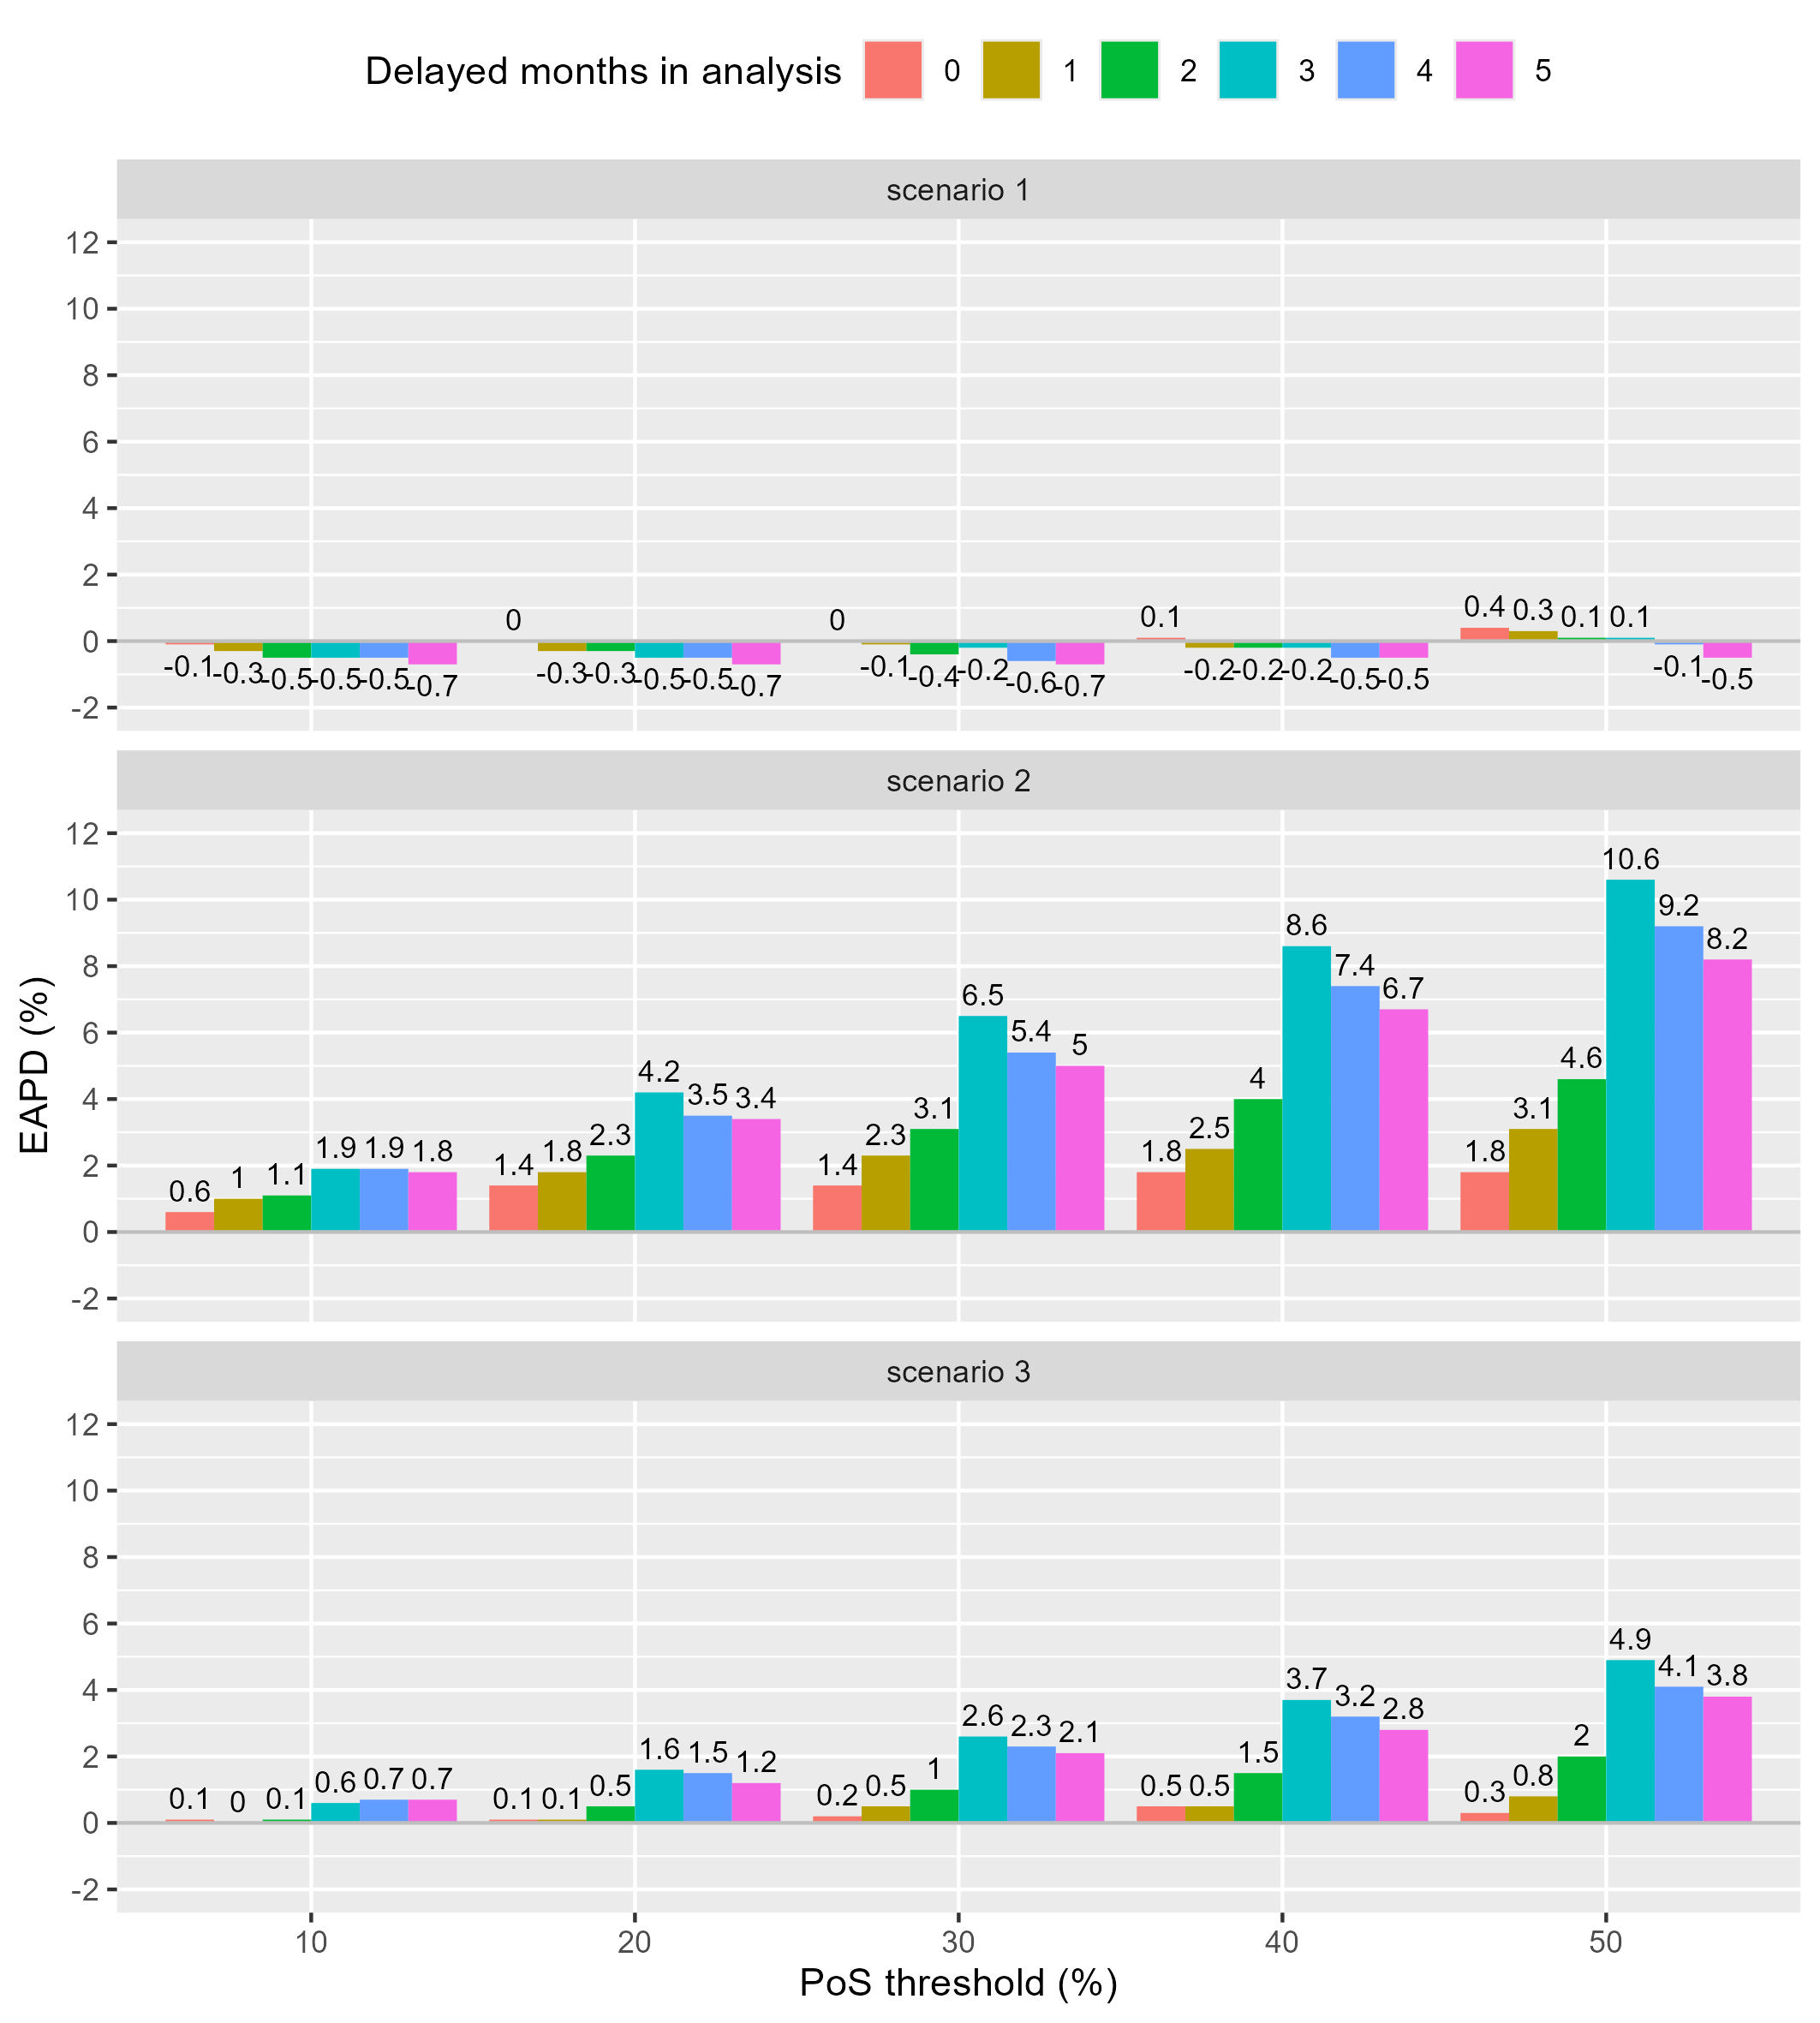


**Figure S8**. EAPDs (%) between Cases with and without Short-Term Endpoints Incorporated at Different Effect Delay Times.

For Scenarios 1, 2, and 3, the actual effect delay times are all 3 months; the effect delay times specified in the analysis are 0, 1, 2, 3, 4, and 5 months, respectively.
